# Supplementary material for: Two Annulated Azaheterocyclic Cores Readily Available from a Single Tetrahydroisoquinolonic Castagnoli–Cushman Precursor
Source: MDPI journal article supplement (doi:10.3390/molecules25092049), 2020-04-28
Supplement: s1 [file s1]

## Supporting Information for

### Two annulated azaheterocyclic cores readily available from a single tetrahydroisoquinolonic Castagnoli-Cushman precursor

Elizaveta Karchuganova,<sup>a</sup> Olga Bakulina,<sup>a</sup> Dmitry Dar'in<sup>a</sup> and Mikhail Krasavin<sup>\*a</sup>

<sup>a</sup>*Saint Petersburg State University, Saint Petersburg 199034, Russian Federation*

\* Corresponding Author; phone: + 7 931 3617872, fax: +7 812 428 6939.

E-mail: [m.krasavin@spbu.ru](mailto:m.krasavin@spbu.ru); <https://krasavin-group.org/>

#### Table of contents

|                                                                                   |            |
|-----------------------------------------------------------------------------------|------------|
| 1. Table S1. Reaction conditions screening for the reduction of compound <b>5</b> | <b>S2</b>  |
| 2. Crystallographic data for compound <b>7</b>                                    | <b>S2</b>  |
| 3. Copies of NMR spectra for compounds <b>2,4,5,7-11</b>                          | <b>S4</b>  |
| 4. References                                                                     | <b>S12</b> |

**1. Table S1.** Reaction conditions screening for the reduction of compound **5**

| Entry | Reagents and conditions                                                                           | Result (according to NMR)                                                                         |
|-------|---------------------------------------------------------------------------------------------------|---------------------------------------------------------------------------------------------------|
| 1     | Na <sub>2</sub> S <sub>2</sub> O <sub>4</sub> (4 equiv.), DME-H <sub>2</sub> O (1:1), reflux, 16h | Decomposition of substrate                                                                        |
| 2     | SnCl <sub>2</sub> (5 equiv.), EtOH, reflux, 16h                                                   | Decomposition of substrate                                                                        |
| 3     | H <sub>2</sub> (1 atm), THF, 10% wt Pd/C, r.t., 16h                                               | Full conversion. Two products (3:1) - compound <b>4</b> + corresponding NH-lactam (overreduction) |
| 4     | HCO <sub>2</sub> H (50 equiv.), MeOH-THF (1:1), 10% wt Pd/C, reflux, 16h                          | Full conversion. Compound <b>4</b> + two unknown by-products (2:1:1)                              |
| 5     | HCO <sub>2</sub> NH <sub>4</sub> (10 equiv.), MeOH, 10% wt Pd/C, reflux, 16h                      | Compound <b>4</b> was isolated in 96% yield                                                       |
| 6     | Na <sub>2</sub> S (6 equiv.), dioxane-water (1:1), 70 °C, 16h                                     | Compound <b>7</b> was isolated in 91% yield                                                       |

**2. Crystallographic data**

X-ray single crystal analysis was performed on Agilent Technologies «Supernova» diffractometer with monochromated Cu K $\alpha$  radiation. The temperature was kept at 293 K during data collection. Using Olex2[1], the structure was solved with the SHELXT[2] structure solution program using Intrinsic Phasing and refined with the SHELXL[3] refinement package using Least Squares minimization. *CCDC 1996076* contains the supplementary crystallographic data for this paper. These data can be obtained free of charge from The Cambridge Crystallographic Data Centre via <http://www.ccdc.cam.ac.uk>.

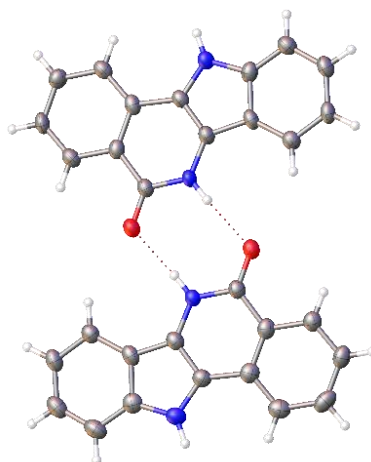**Figure S1.** Crystal structure of compound **7****Table S2.** Crystal data and structure refinement for compound **7**

|                   |                                                               |
|-------------------|---------------------------------------------------------------|
| Empirical formula | C <sub>30</sub> H <sub>20</sub> N <sub>4</sub> O <sub>2</sub> |
| Formula weight    | 468.50                                                        |
| Temperature/K     | 293(2)                                                        |
| Crystal system    | monoclinic                                                    |
| Space group       | P2 <sub>1</sub> /c                                            |
| a/Å               | 11.0070(3)                                                    |
| b/Å               | 15.9054(4)                                                    |

|                                                |                                                                    |
|------------------------------------------------|--------------------------------------------------------------------|
| c/Å                                            | 12.3765(4)                                                         |
| $\alpha/^\circ$                                | 90                                                                 |
| $\beta/^\circ$                                 | 95.846(3)                                                          |
| $\gamma/^\circ$                                | 90                                                                 |
| Volume/Å <sup>3</sup>                          | 2155.49(11)                                                        |
| Z                                              | 4                                                                  |
| $\rho_{\text{calc}}/\text{cm}^3$               | 1.444                                                              |
| $\mu/\text{mm}^{-1}$                           | 0.744                                                              |
| F(000)                                         | 976.0                                                              |
| Radiation                                      | CuK $\alpha$ ( $\lambda = 1.54184$ )                               |
| 2 $\Theta$ range for data collection/ $^\circ$ | 8.074 to 141.34                                                    |
| Index ranges                                   | $-13 \leq h \leq 13$ , $-19 \leq k \leq 19$ , $-13 \leq l \leq 15$ |
| Reflections collected                          | 23901                                                              |
| Independent reflections                        | 4127 [ $R_{\text{int}} = 0.0518$ , $R_{\text{sigma}} = 0.0297$ ]   |
| Data/restraints/parameters                     | 4127/0/325                                                         |
| Goodness-of-fit on $F^2$                       | 1.054                                                              |
| Final R indexes [ $I > 2\sigma(I)$ ]           | $R_1 = 0.0686$ , $wR_2 = 0.1930$                                   |
| Final R indexes [all data]                     | $R_1 = 0.0752$ , $wR_2 = 0.1995$                                   |
| Largest diff. peak/hole / e Å <sup>-3</sup>    | 0.81/-0.33                                                         |

### 3. Copies of NMR spectra for compounds 2,4,5,7-11

#### $^1\text{H}$ - and $^{13}\text{C}$ -spectra of compound 5

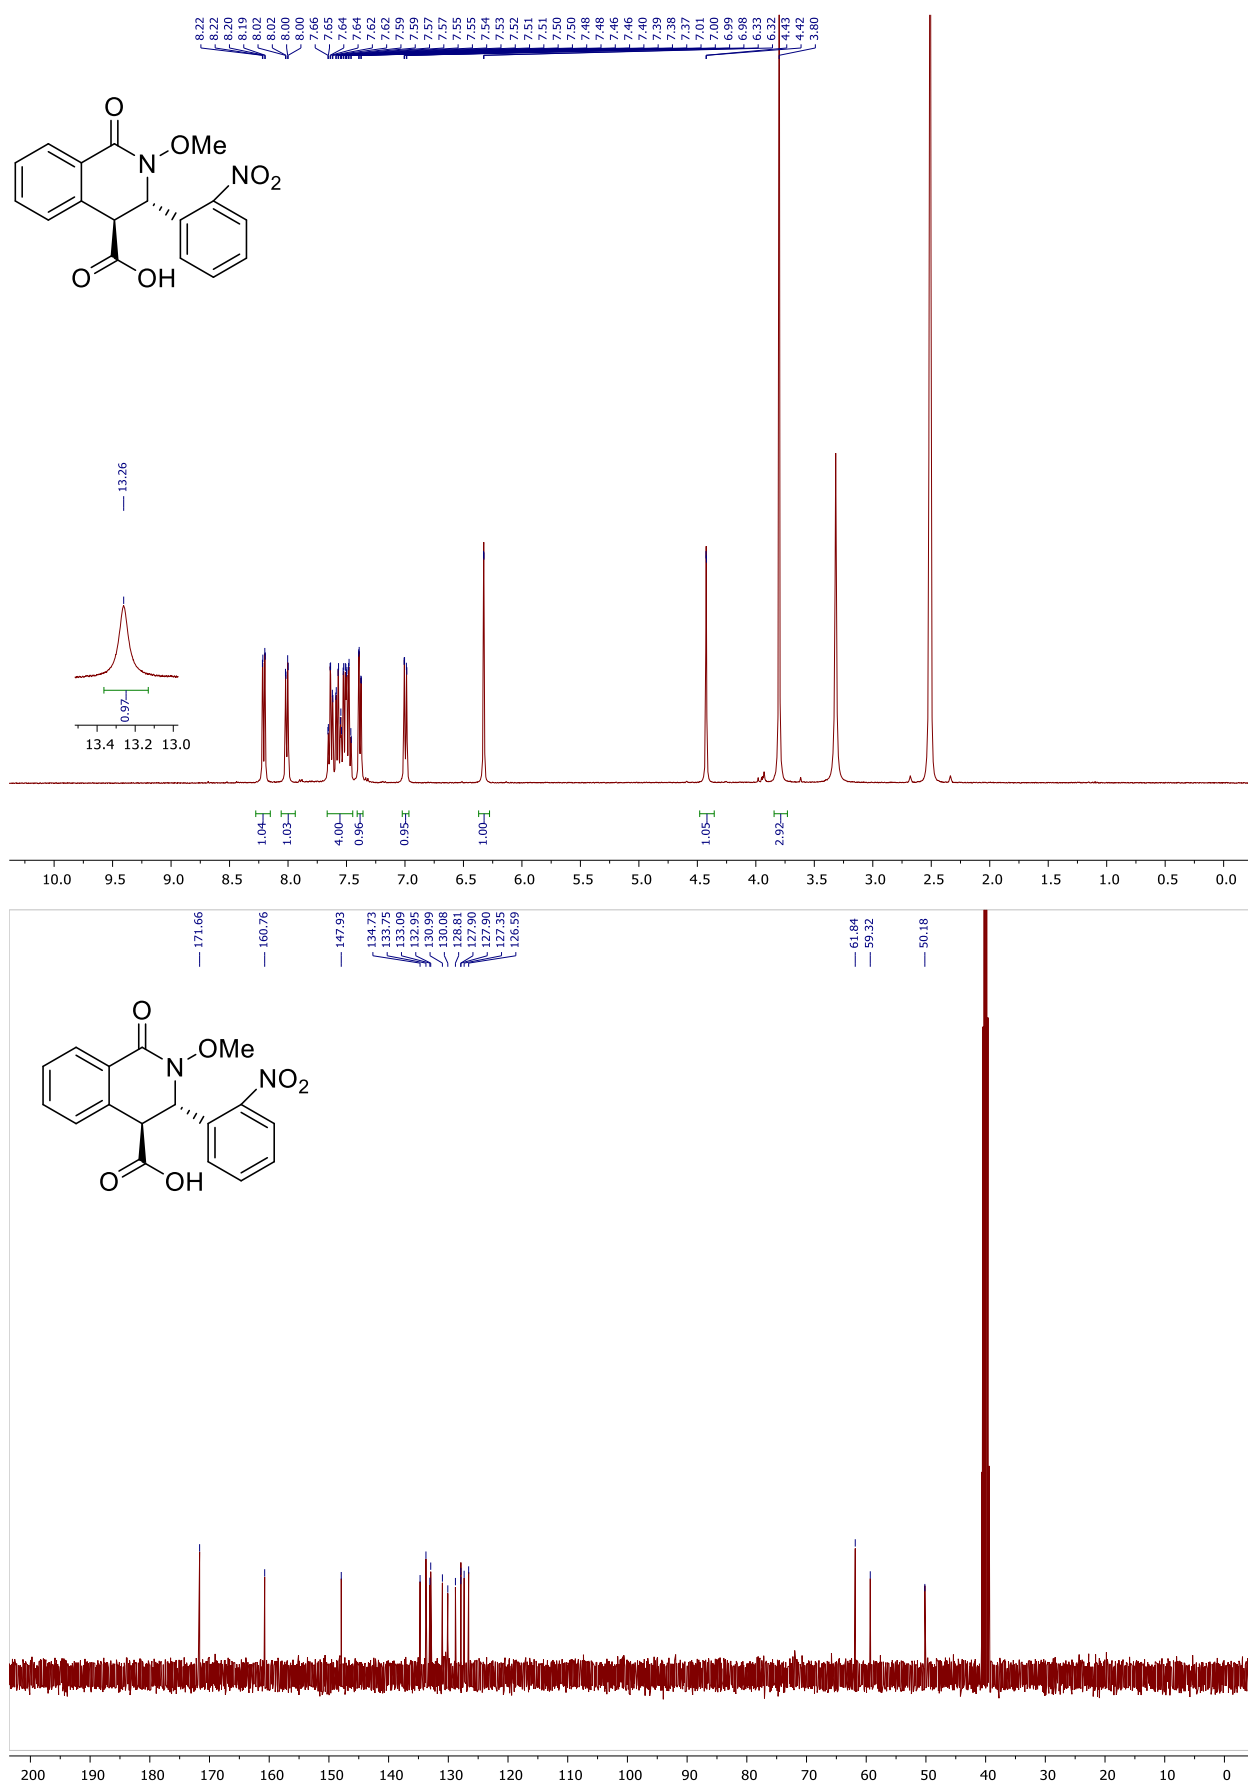

# <sup>1</sup>H- and <sup>13</sup>C-spectra of compound 7

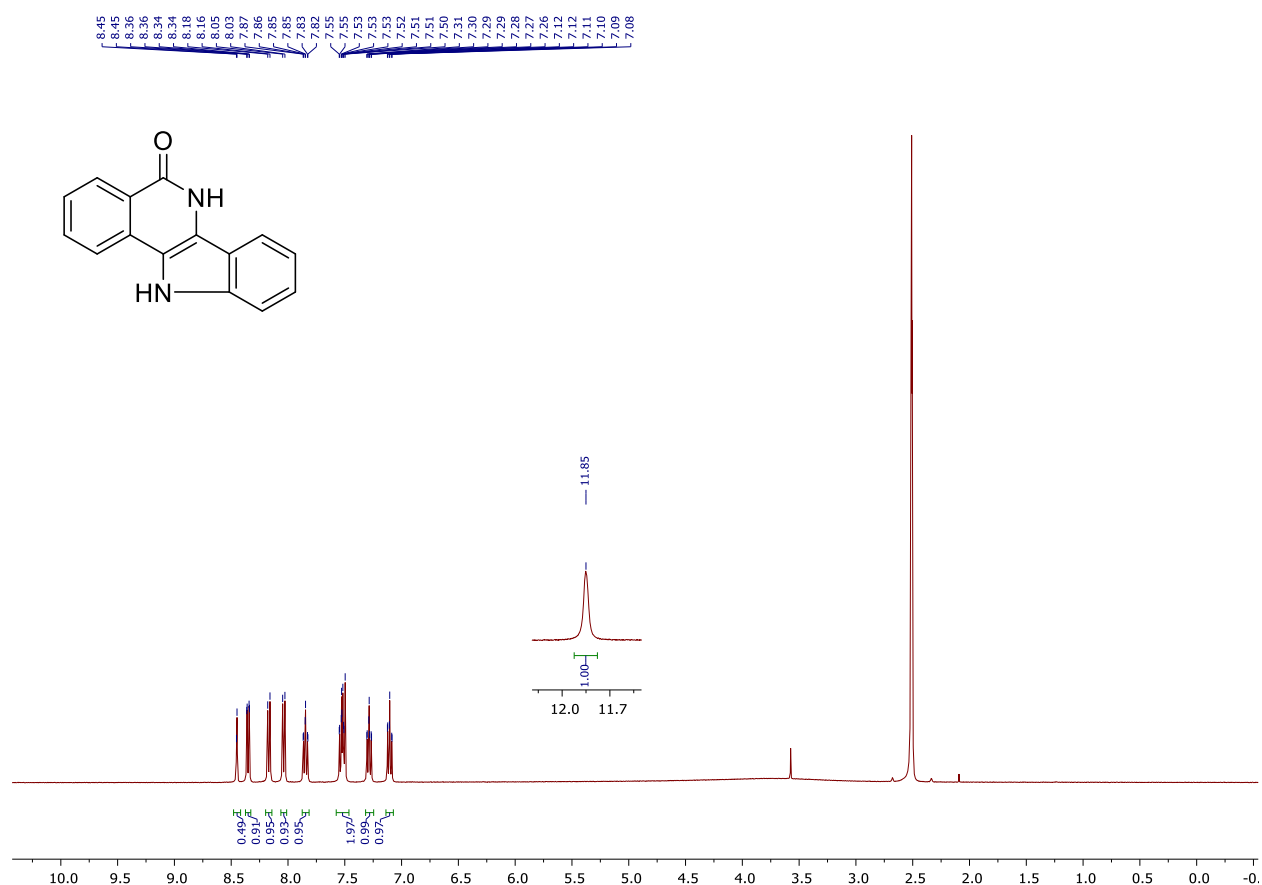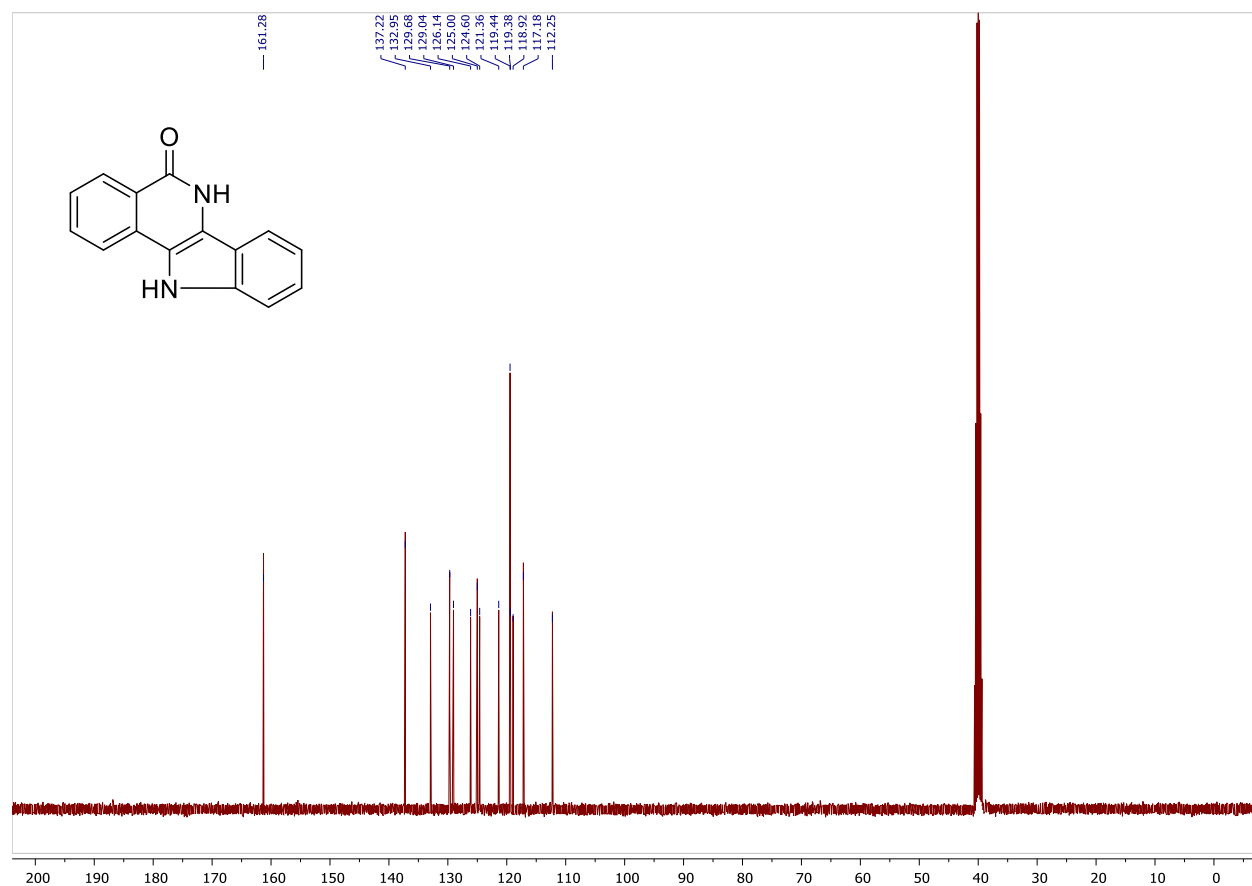

# <sup>1</sup>H- and <sup>13</sup>C-spectra of compound 4

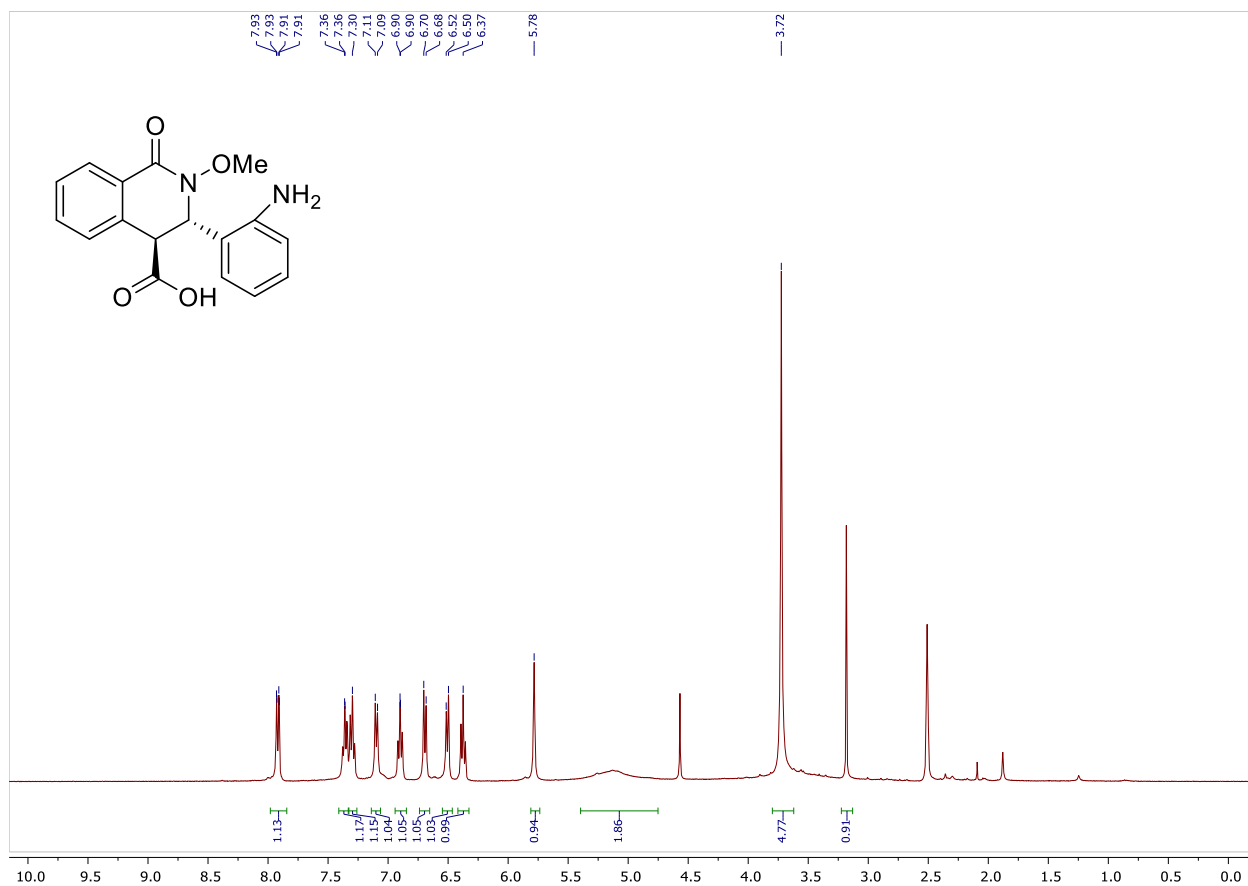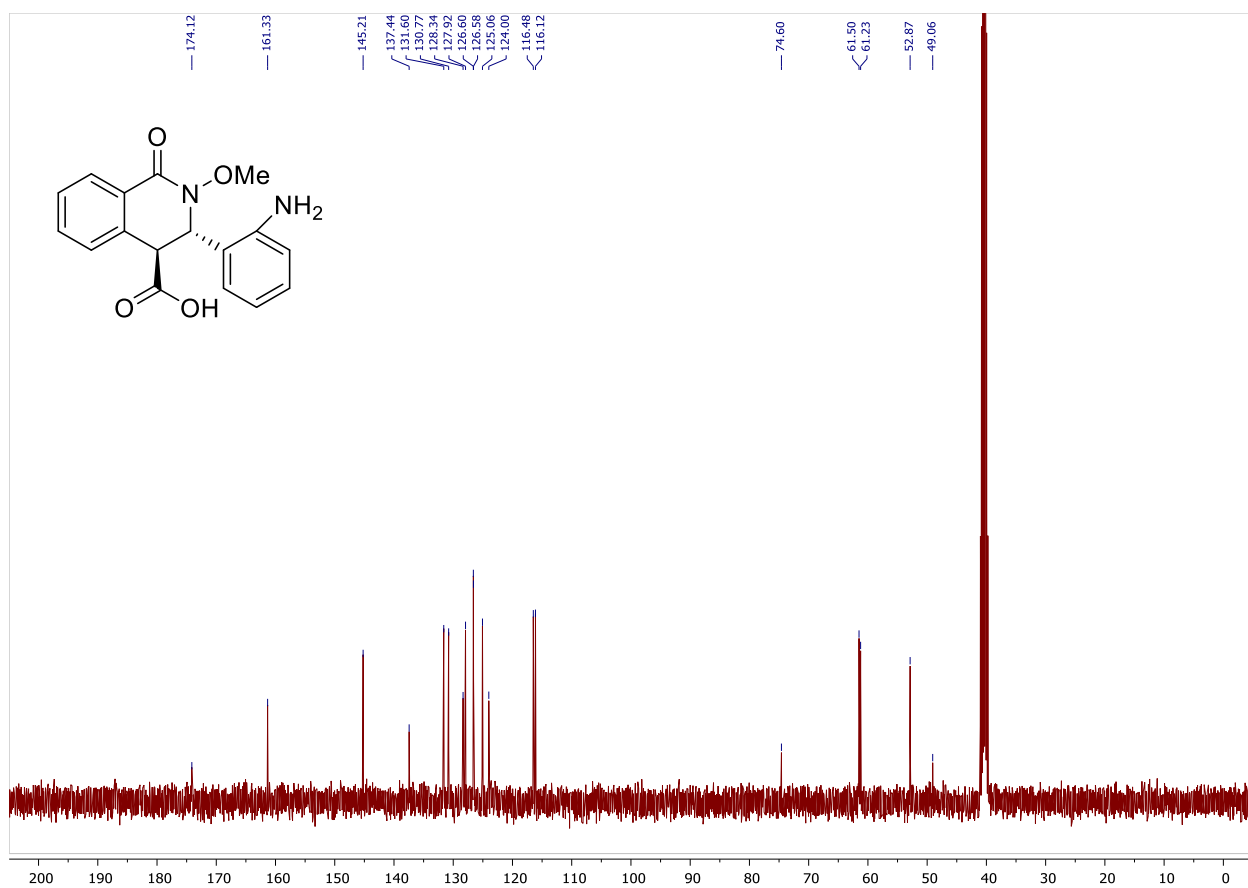

# <sup>1</sup>H- and <sup>13</sup>C-spectra of compound 8

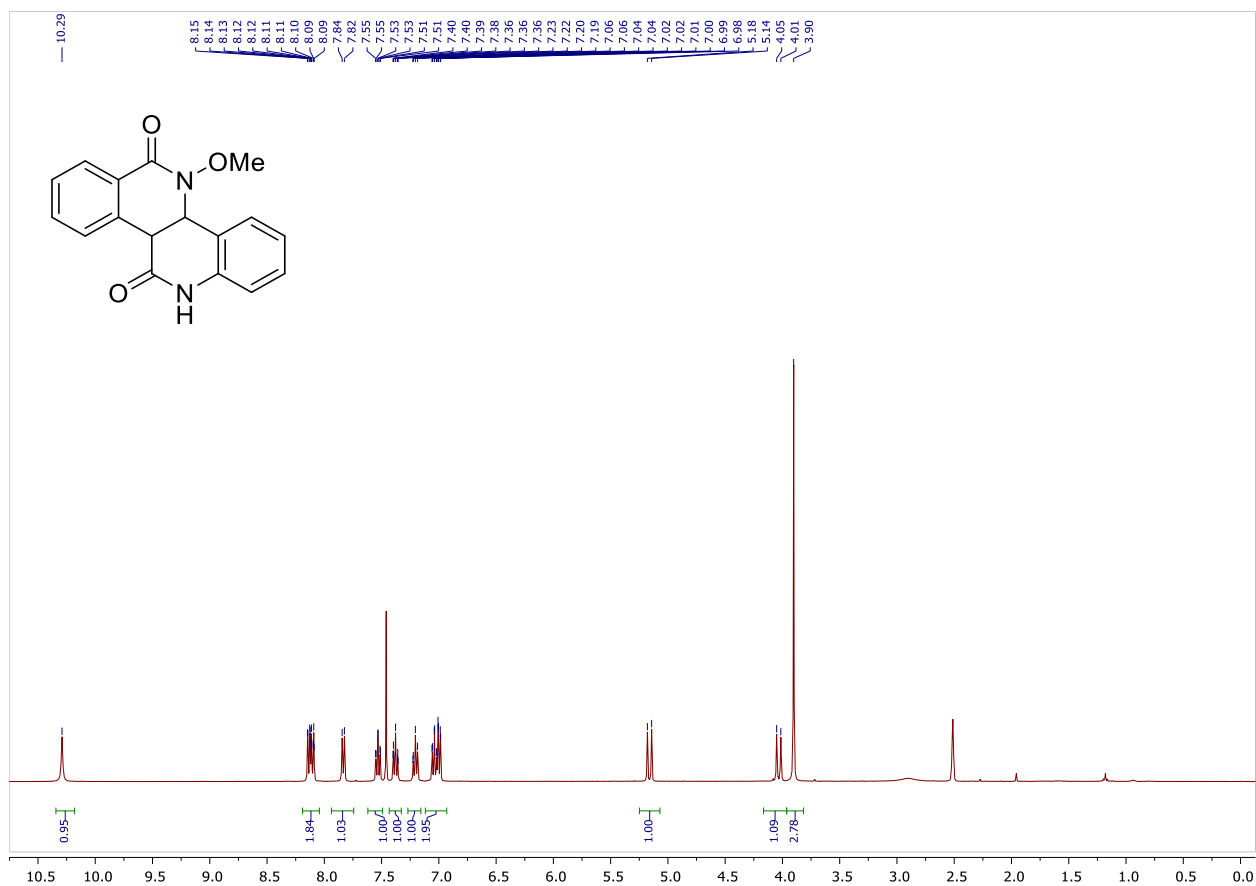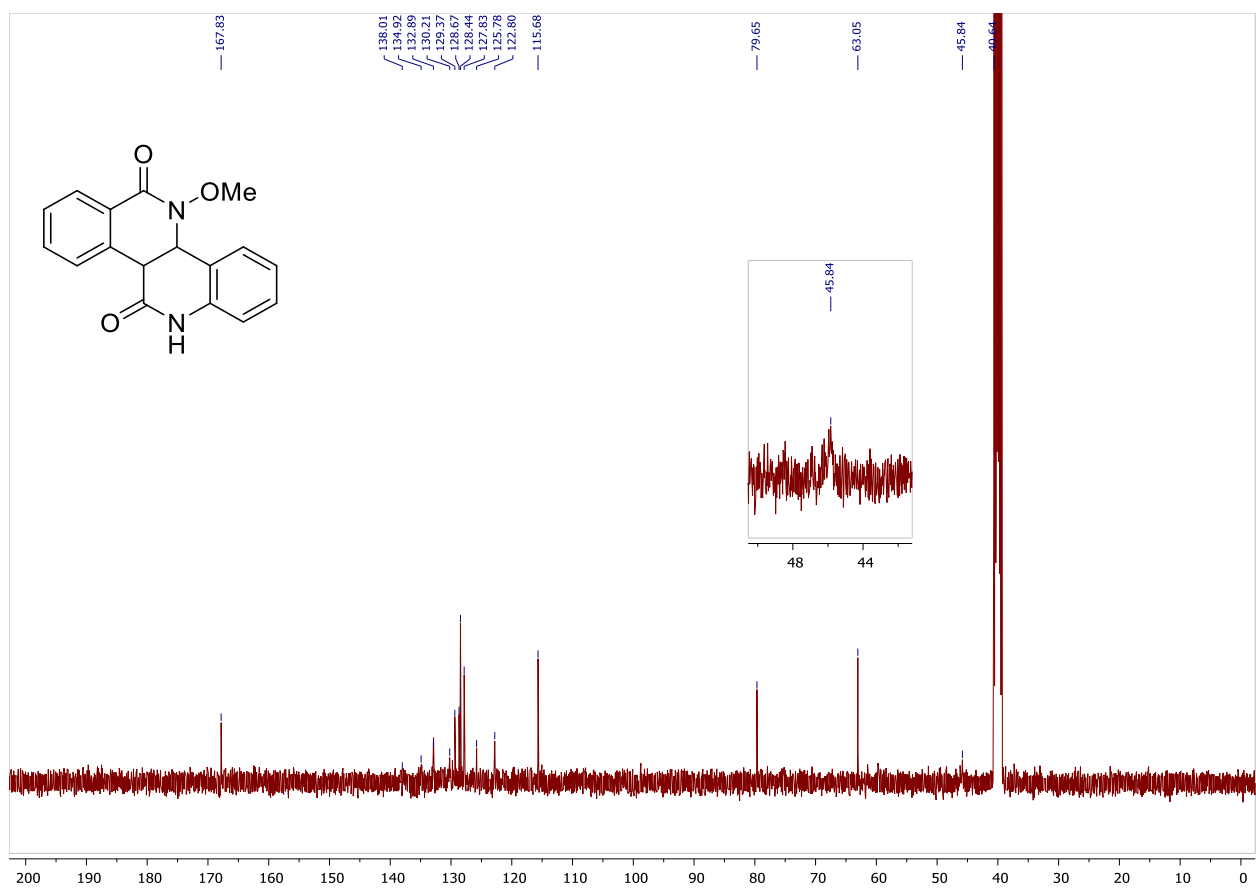

# <sup>1</sup>H- and <sup>13</sup>C-spectra of compound 9

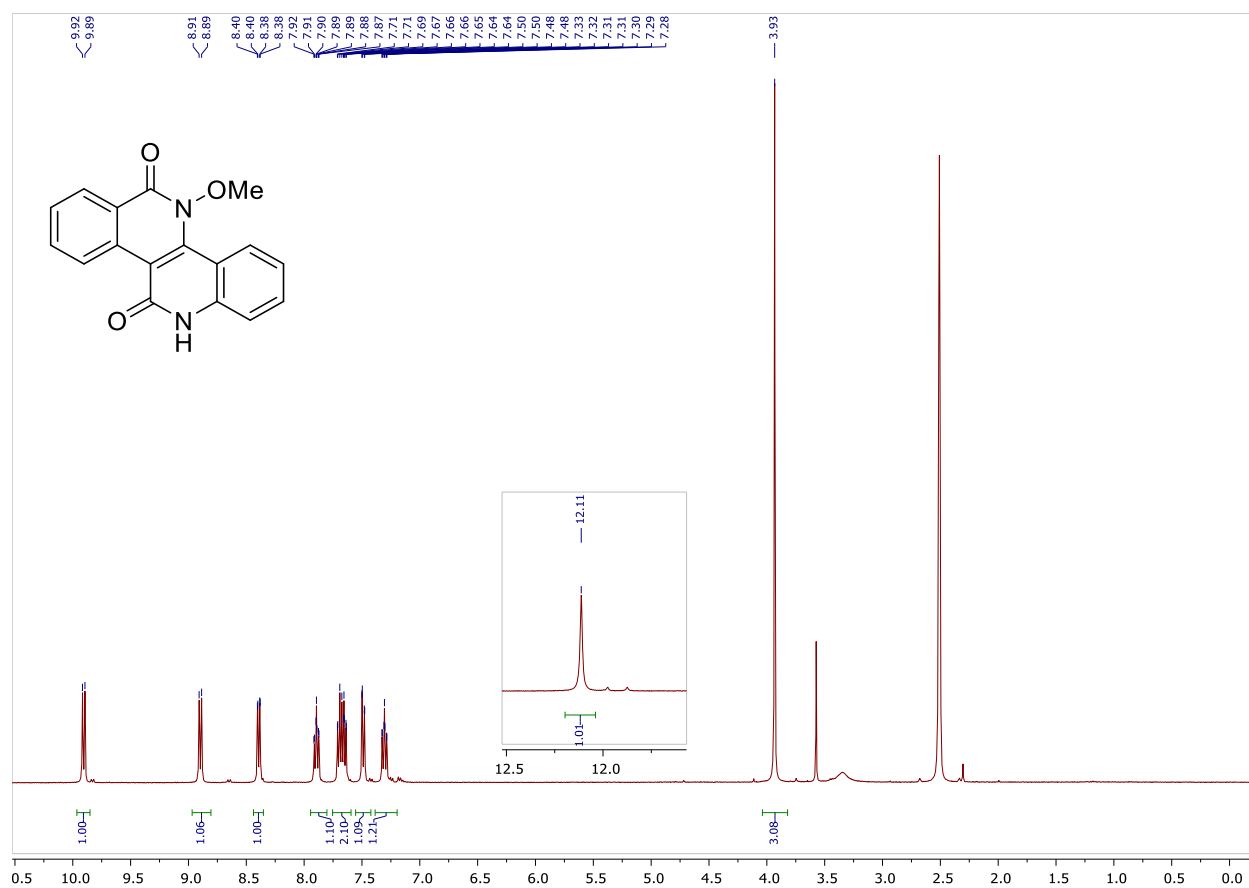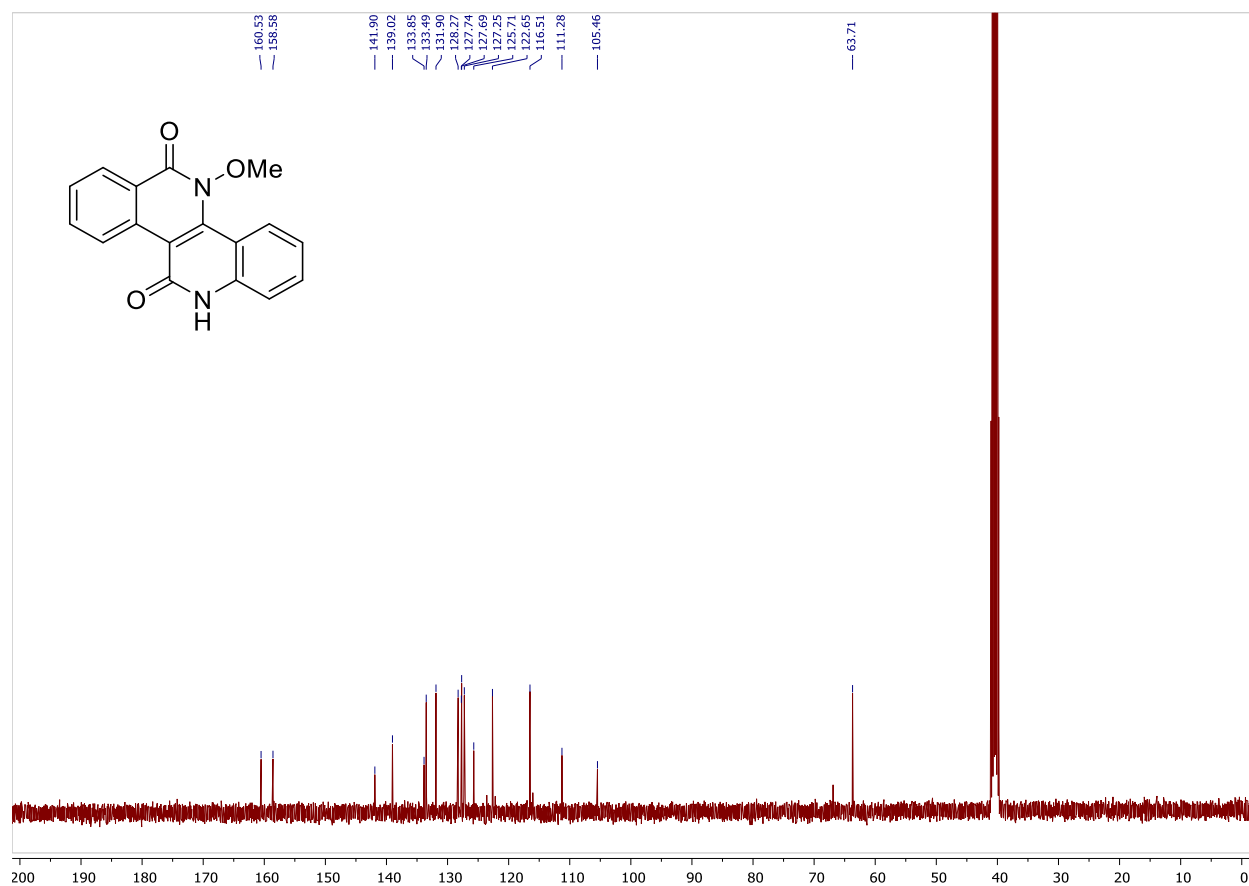



# <sup>1</sup>H- and <sup>13</sup>C-spectra of compound 2

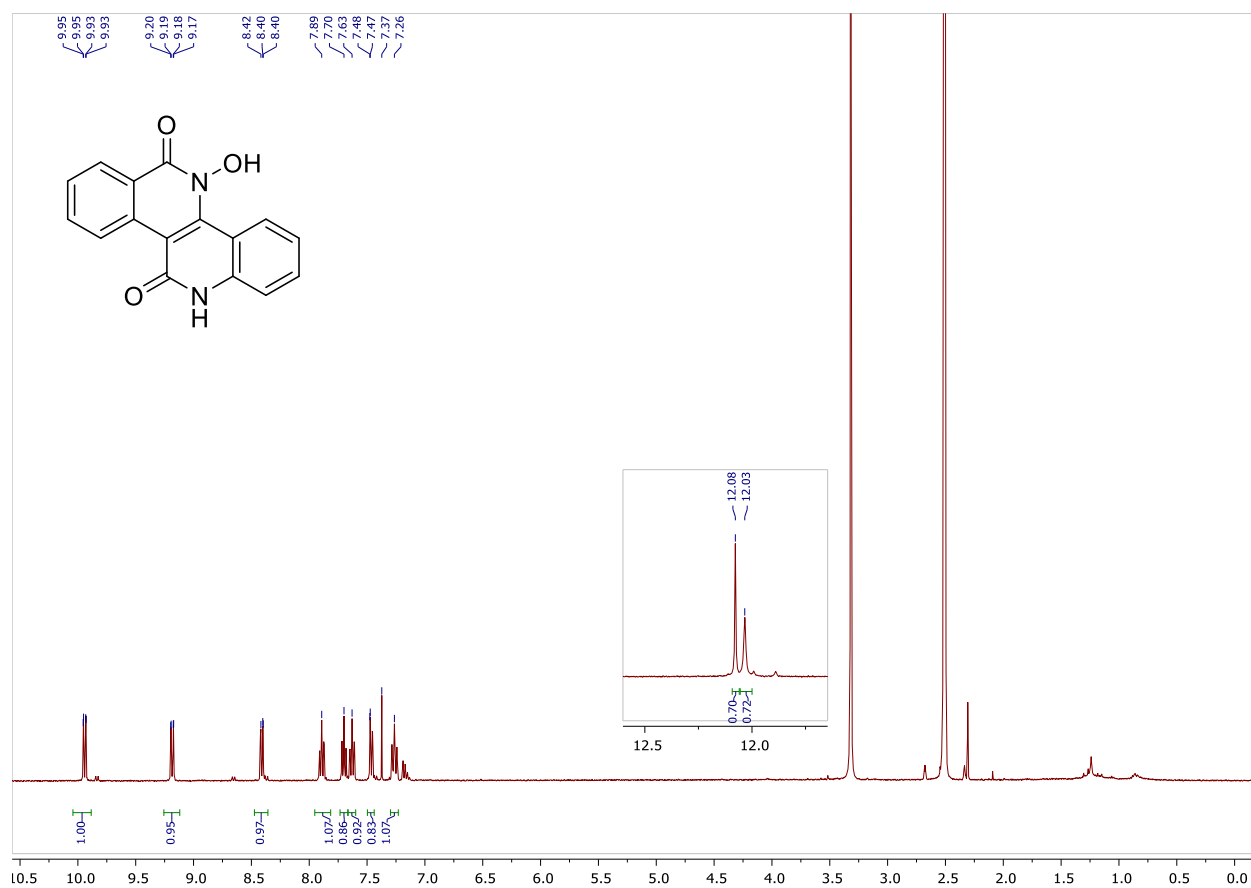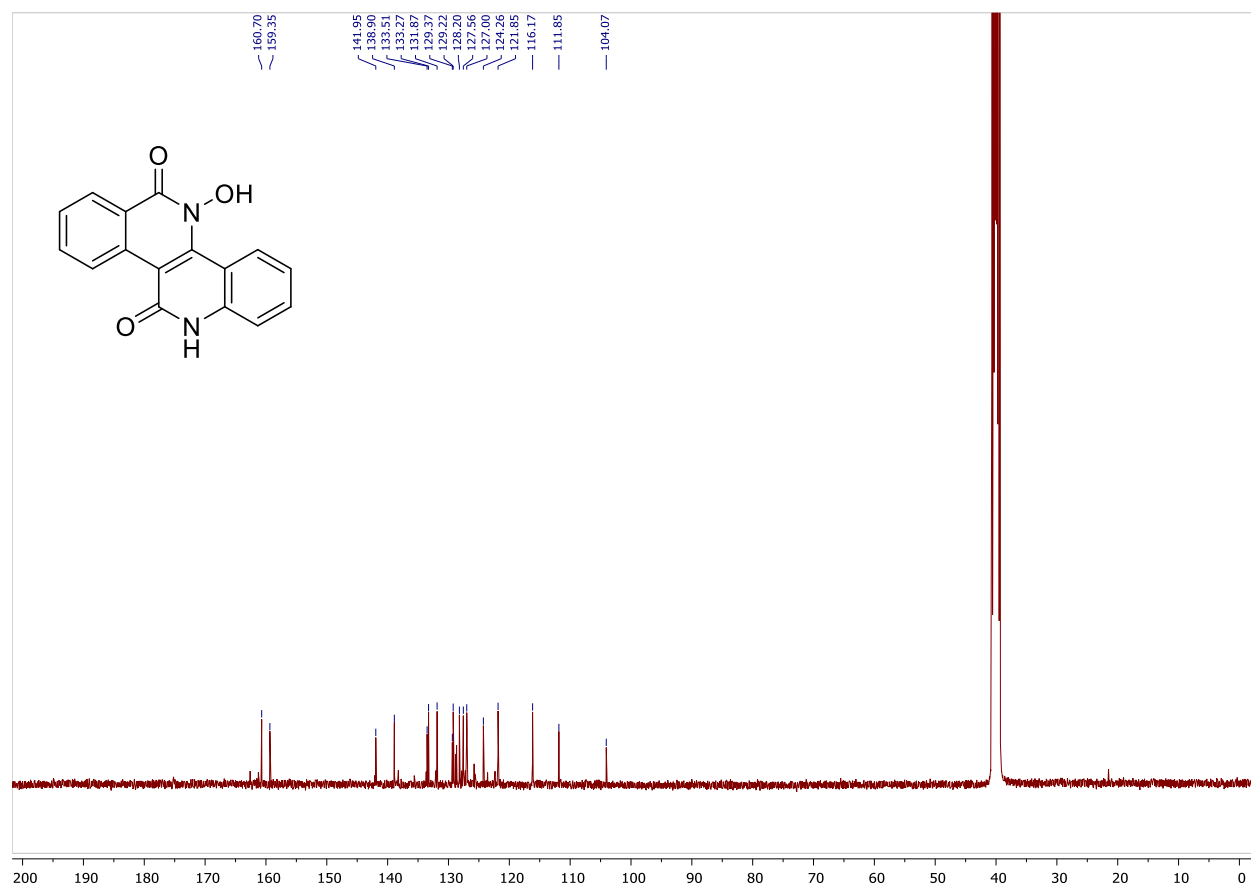

# <sup>1</sup>H- and <sup>13</sup>C-spectra of compound 10

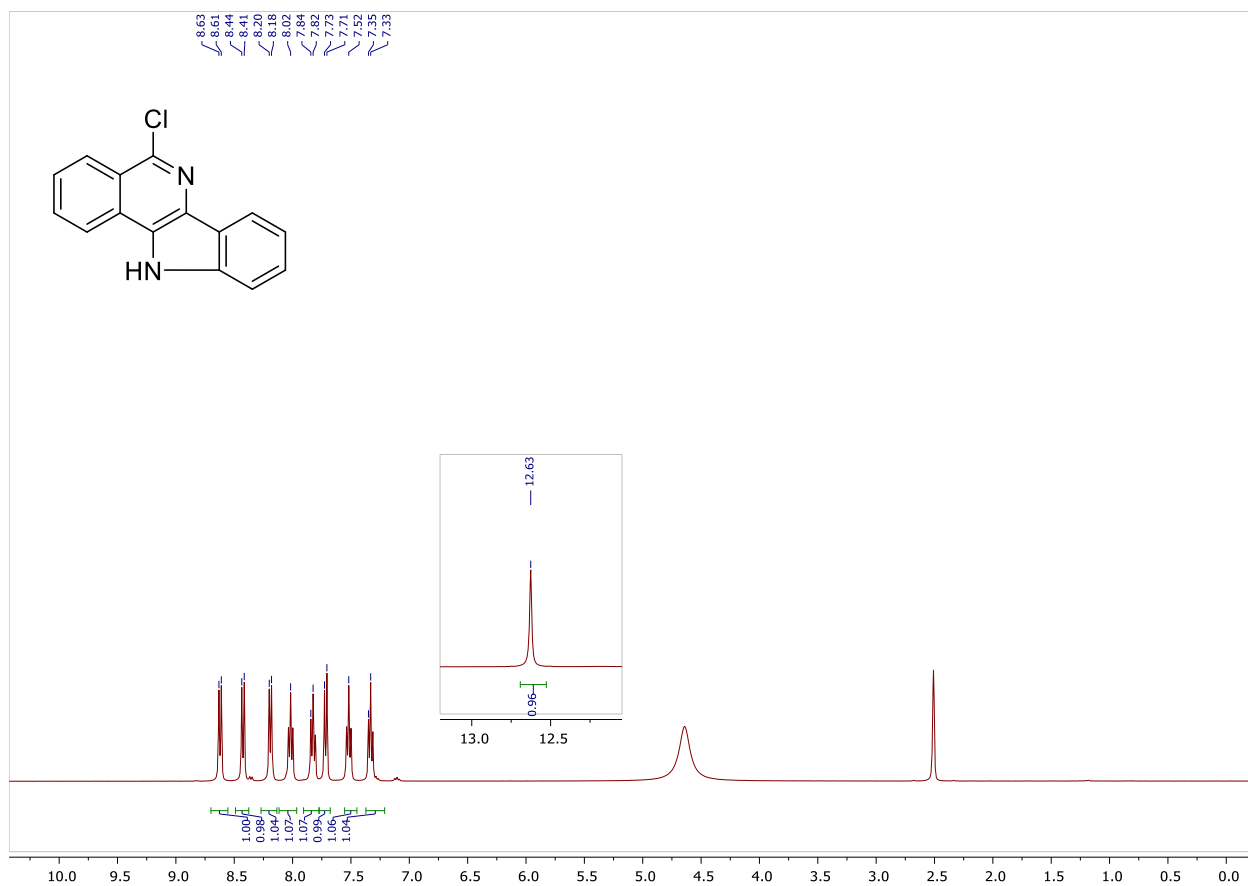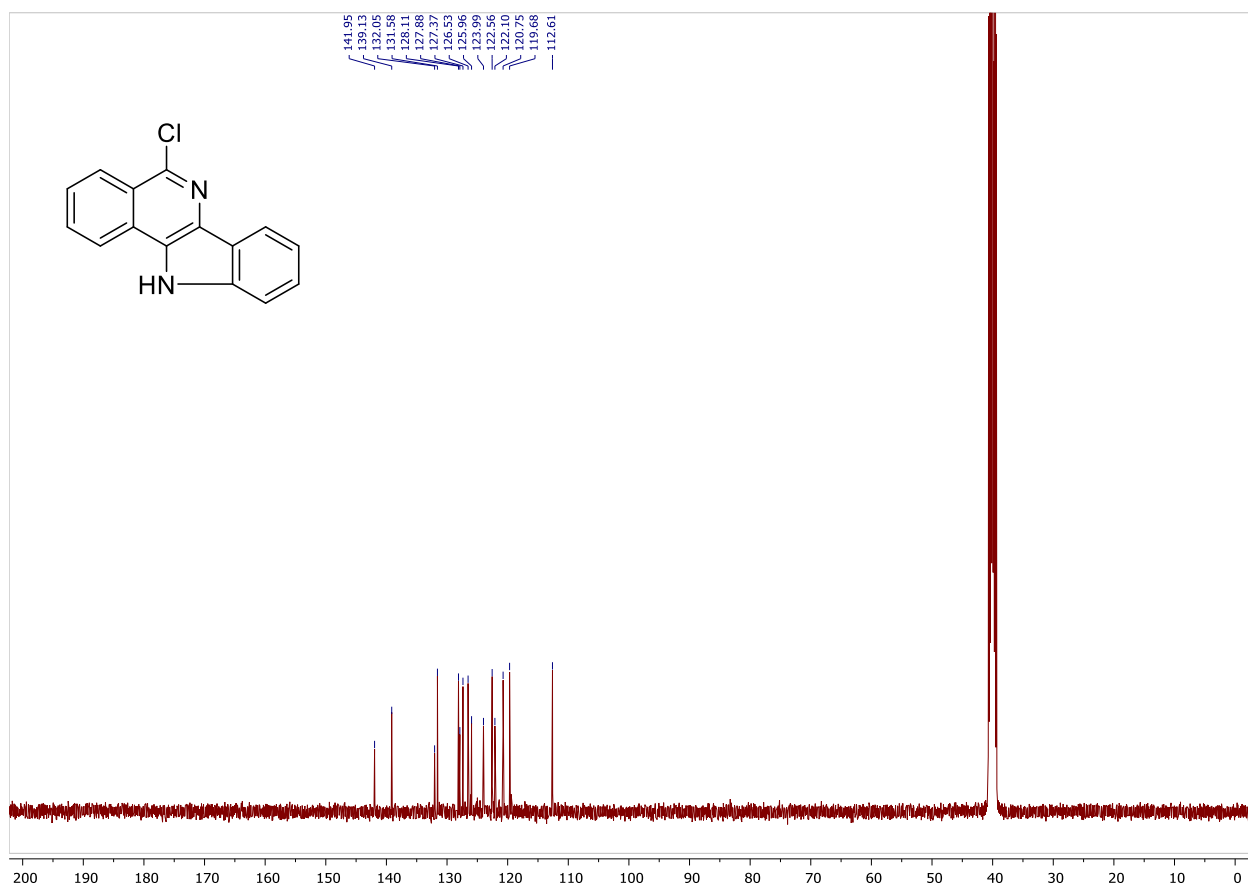

# <sup>1</sup>H- and <sup>13</sup>C-spectra of compound 11

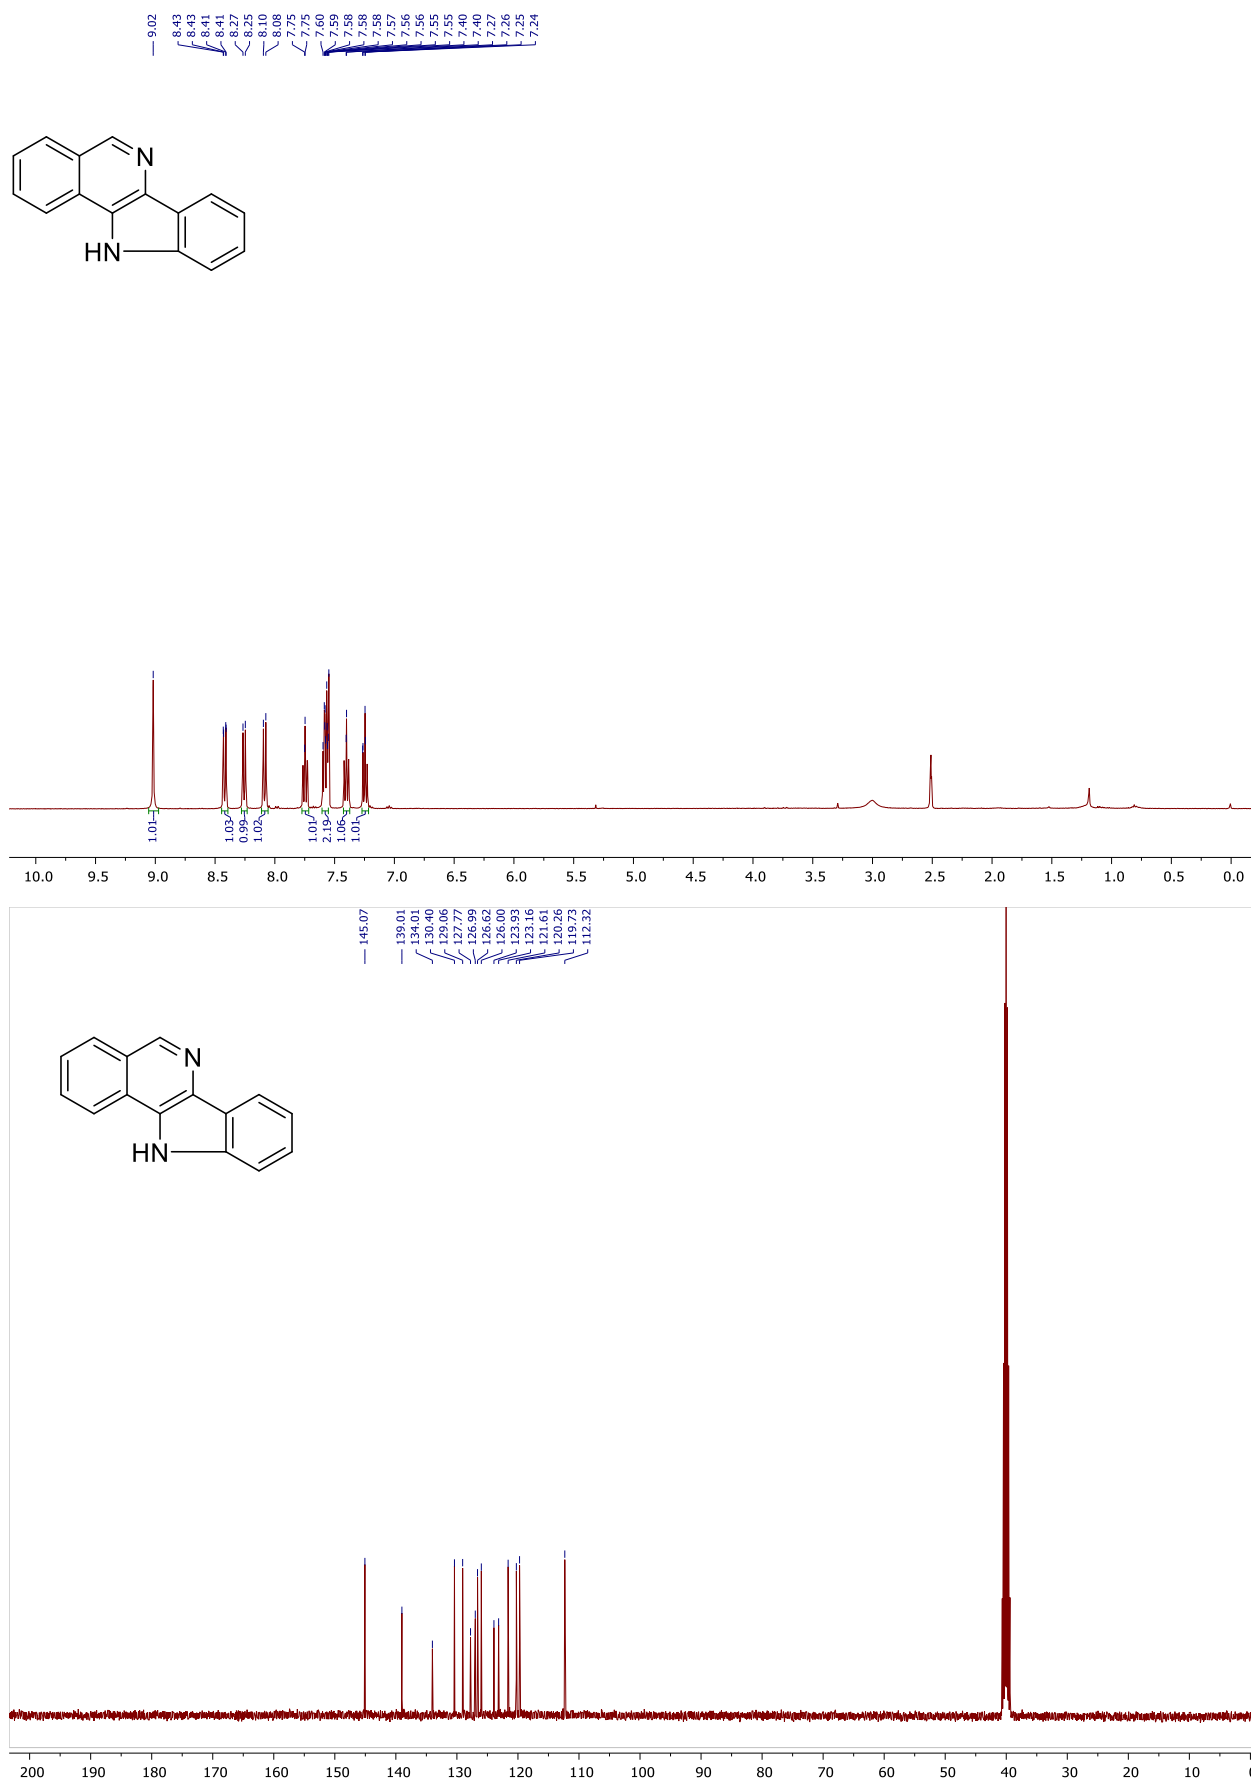

#### 4. References

1. Dolomanov, O. V.; Bourhis, L. J.; Gildea, R. J.; Howard, J. A. K.; Puschmann, H., OLEX2: a complete structure solution, refinement and analysis program. *J. Appl. Crystallogr.* **2009**, 42, (2), 339-341, DOI: 10.1107/s0021889808042726.
2. Sheldrick, G. M., SHELXT - integrated space-group and crystal-structure determination. *Acta Crystallogr. A* **2015**, 71, (Pt 1), 3-8, DOI: 10.1107/S2053273314026370.
3. Sheldrick, G. M., Crystal structure refinement with SHELXL. *Acta Crystallogr. C* **2015**, 71, (Pt 1), 3-8, DOI: 10.1107/S2053229614024218.
